# Supplementary material for: Variations in plasma concentrations of tamoxifen metabolites and the effects of genetic polymorphisms on tamoxifen metabolism in Korean patients with breast cancer
Source: PubMed Central journal article supplement (PMC5725021; doi:10.18632/oncotarget.22220), 2017-11-01
Supplement: oncotarget-08-100296-s001.pdf [file oncotarget-08-100296-s001.pdf]

## **Variations in plasma concentrations of tamoxifen metabolites and the effects of genetic polymorphisms on tamoxifen metabolism in Korean patients with breast cancer**

### **SUPPLEMENTARY MATERIALS**

**Supplementary Table 1: Summary of 210 polymorphisms in 16 genes encoding tamoxifen-metabolizing enzymes**

See Supplementary File 1
